# Supplementary material for: Statistical evaluation of methods for identification of differentially abundant genes in comparative metagenomics
Source: PubMed Central journal article supplement (PMC4727335; doi:10.1186/s12864-016-2386-y), 2016-01-25

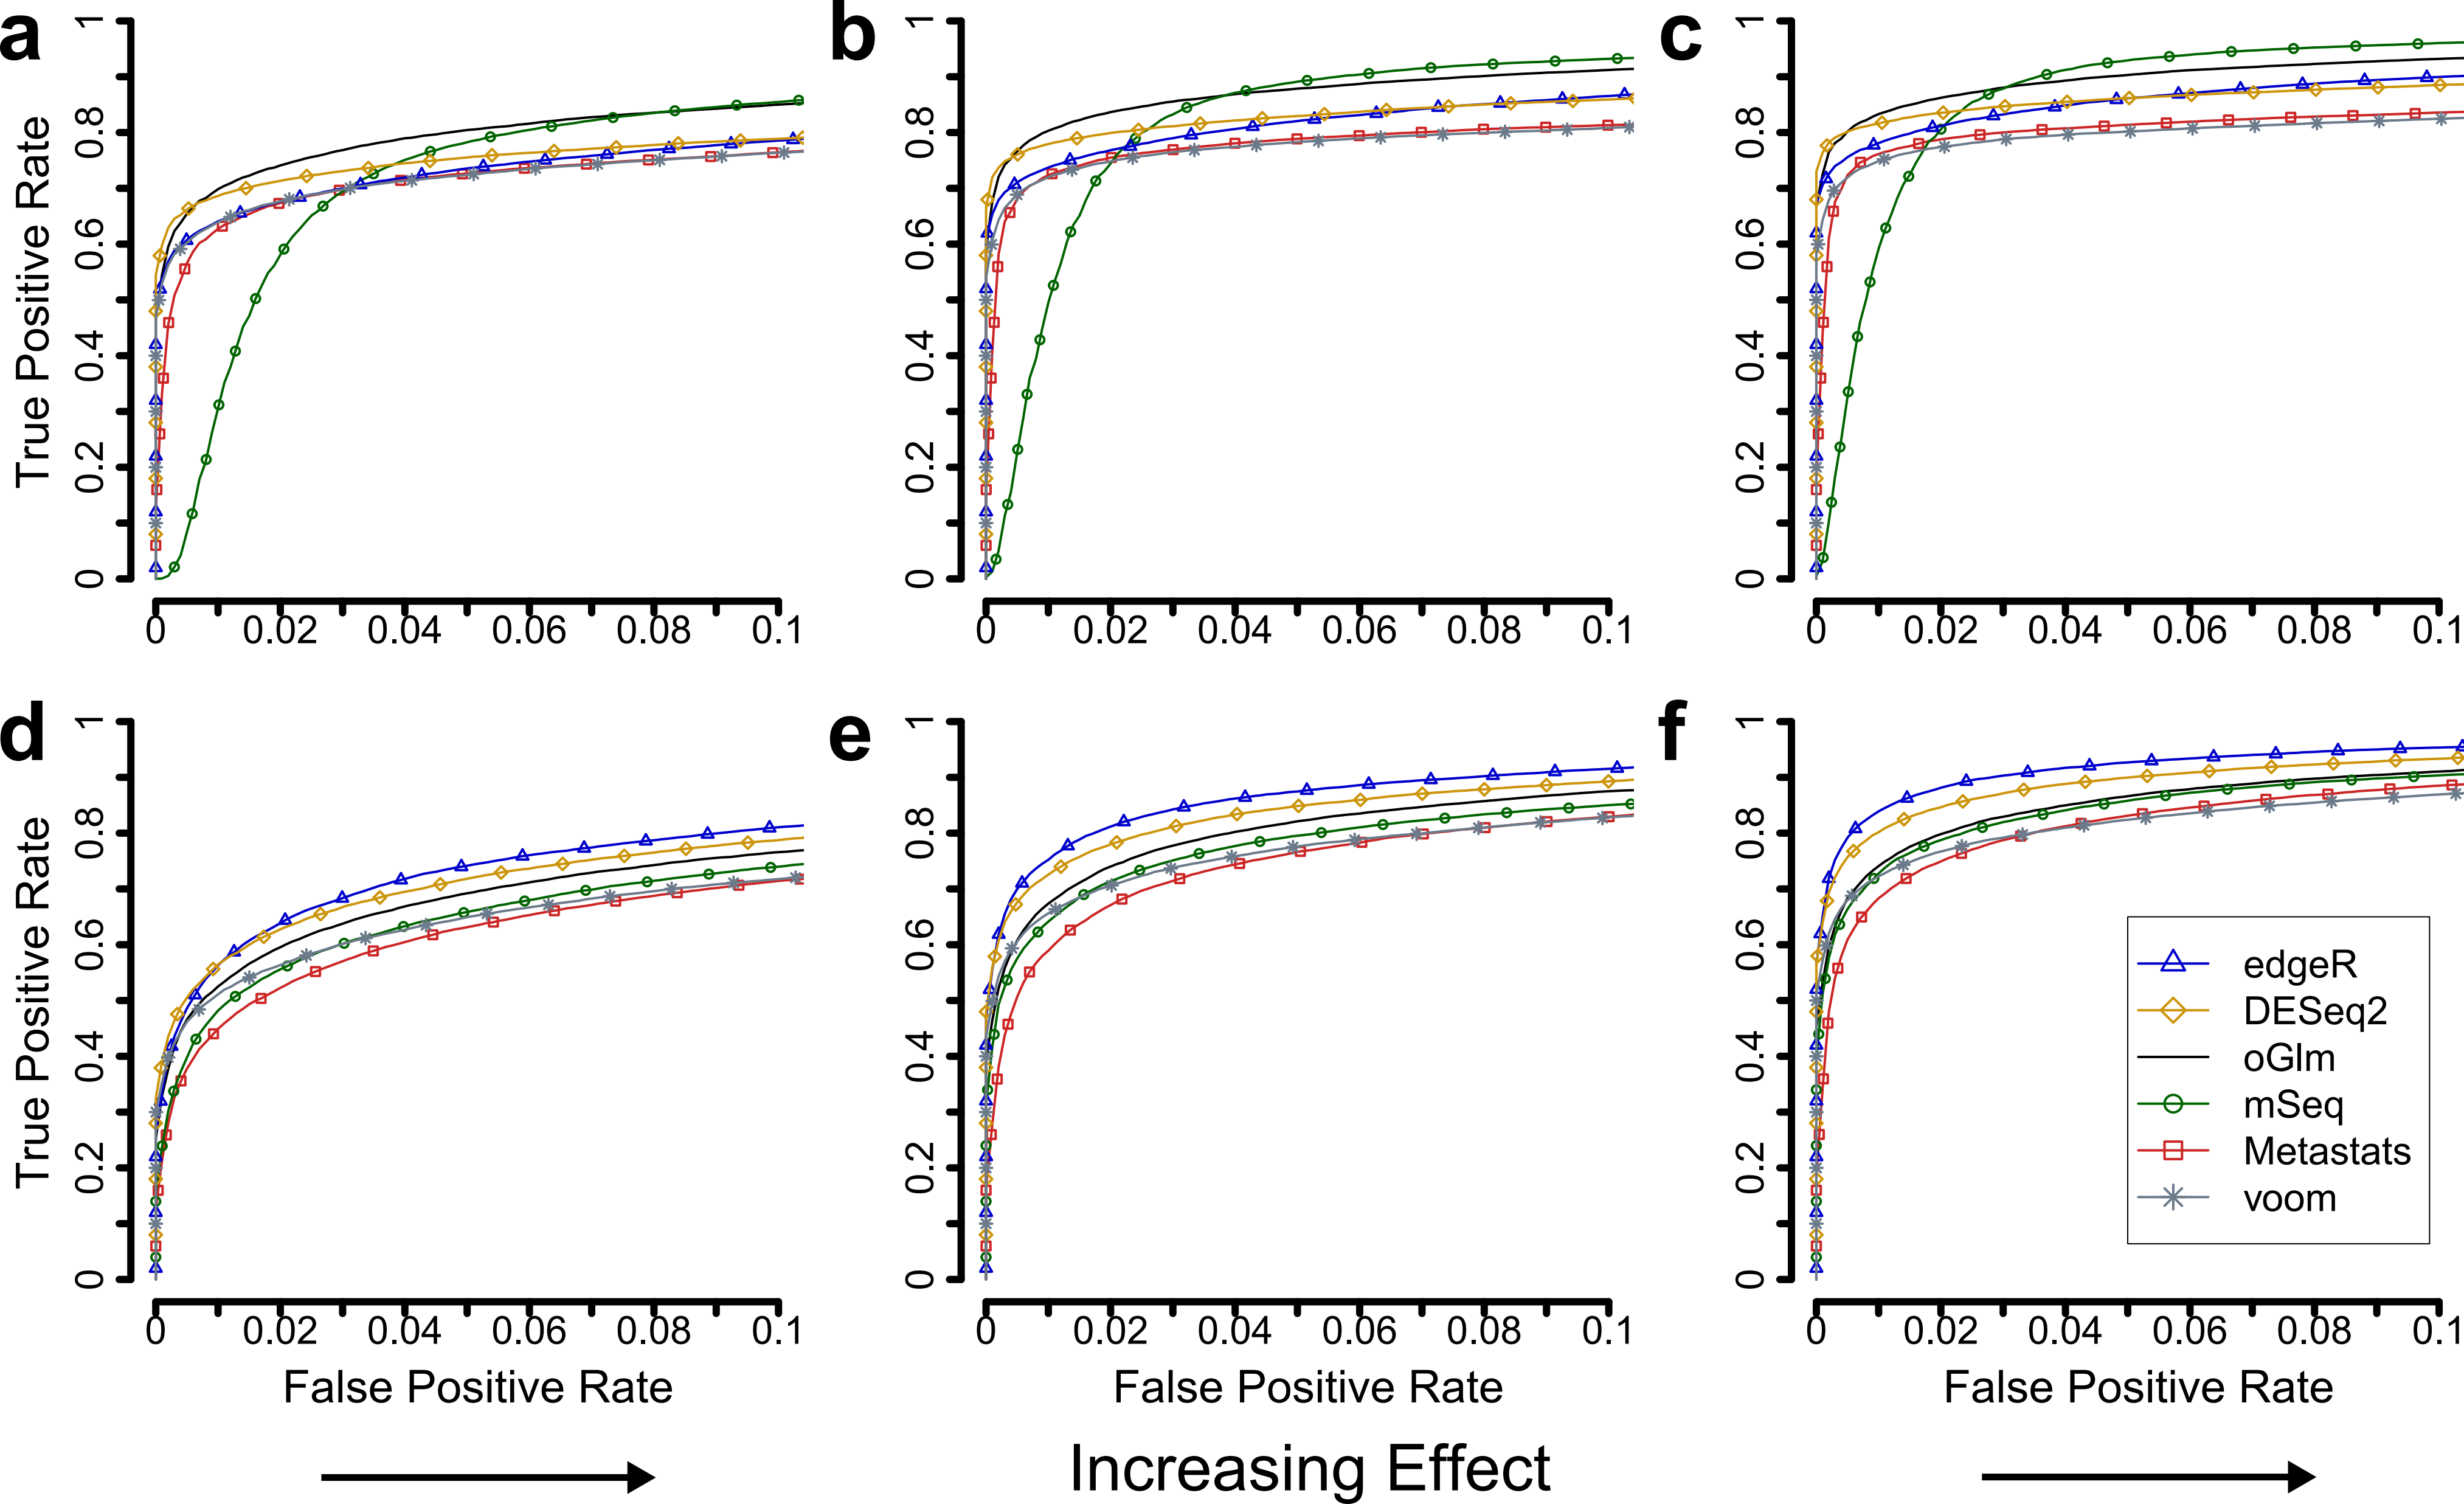

Supplement: 12864_2016_2386_MOESM3_ESM.pdf [file 12864_2016_2386_MOESM3_ESM.pdf]
